# Supplementary material
Source: PubMed Central journal article supplement (PMC5490247)
Supplement: NIHMS858880-supplement-supplement.pdf [file NIHMS858880-supplement-supplement.pdf]

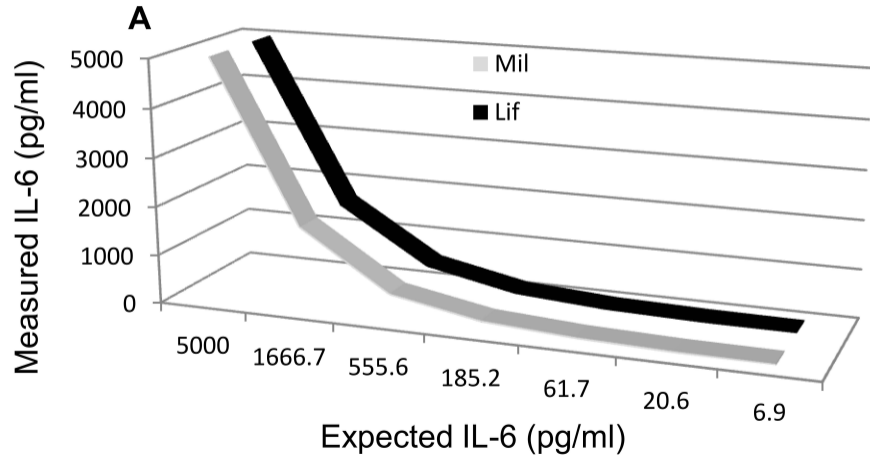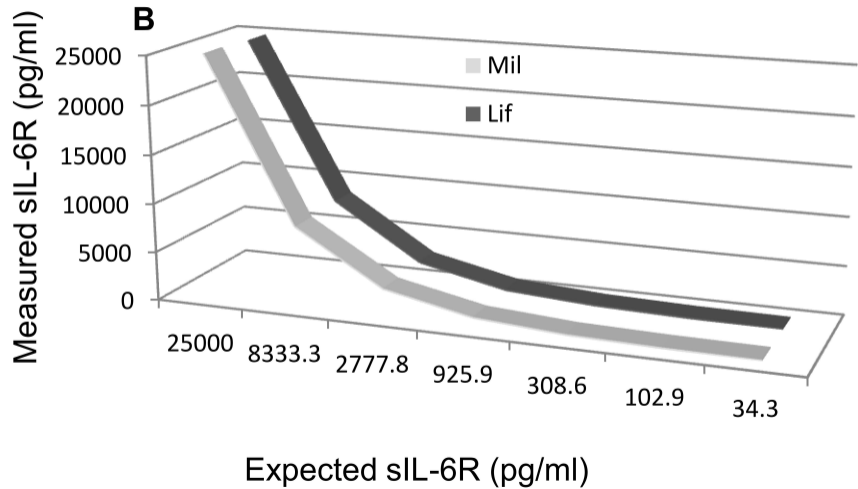

**Supplemental Table 1.**

A.

| STD | STD + 20 ug<br>Silt (%) | P value       | STD + 600 ug<br>Silt (%) | P value       | STD + 1.78 ug<br>sIL-6R (%) | P value       | STD + 160 ug<br>Toci (%) | P value       |
|-----|-------------------------|---------------|--------------------------|---------------|-----------------------------|---------------|--------------------------|---------------|
| 1   | -51                     | <b>0.0004</b> | -56                      | <b>0.0001</b> | -23                         | <b>0.0013</b> | -8                       | 0.0724        |
| 2   | -59                     | <b>0.0029</b> | -63                      | <b>0.0023</b> | -23                         | <b>0.0189</b> | -2                       | 0.3514        |
| 3   | -62                     | <b>0.0030</b> | -65                      | <b>0.0033</b> | -23                         | <b>0.0249</b> | 9                        | 0.1047        |
| 4   | -66                     | <b>0.0012</b> | -71                      | <b>0.0010</b> | -44                         | <b>0.0022</b> | -5                       | 0.3110        |
| 5   | -67                     | <b>0.0006</b> | -73                      | <b>0.0002</b> | -53                         | <b>0.0004</b> | -21                      | <b>0.0250</b> |
| 6   | -58                     | <b>0.0013</b> | -64                      | <b>0.0025</b> | -37                         | <b>0.0015</b> | 6                        | 0.1254        |
| 7   | -70                     | <b>0.0064</b> | -74                      | <b>0.0061</b> | -47                         | <b>0.0152</b> | -13                      | 0.1764        |

B.

| STD | STD + 20 ug<br>Silt (%) | P value       | STD + 600 ug<br>Silt (%) | P value       | STD + 1.78 ug<br>sIL-6R (%) | P value       | STD + 160 ug<br>Toci (%) | P value       |
|-----|-------------------------|---------------|--------------------------|---------------|-----------------------------|---------------|--------------------------|---------------|
| 1   | -72                     | <b>0.0012</b> | -68                      | <b>0.0007</b> | -63                         | <b>0.0036</b> | 24                       | <b>0.0048</b> |
| 2   | -65                     | <b>0.0069</b> | -71                      | <b>0.0058</b> | -56                         | <b>0.0094</b> | -2                       | 0.4020        |
| 3   | -64                     | <b>0.0075</b> | -70                      | <b>0.0063</b> | -57                         | <b>0.0093</b> | -20                      | 0.0637        |
| 4   | -66                     | <b>0.0029</b> | -67                      | <b>0.0025</b> | -52                         | <b>0.0072</b> | -19                      | 0.1378        |
| 5   | -62                     | <b>0.0009</b> | -64                      | <b>0.0026</b> | -55                         | <b>0.0019</b> | -21                      | 0.0854        |
| 6   | -55                     | <b>0.0075</b> | -55                      | <b>0.0073</b> | -45                         | <b>0.0121</b> | -11                      | 0.2285        |
| 7   | -30                     | 0.0861        | -31                      | 0.0877        | -25                         | 0.1247        | 17                       | 0.2196        |

## Supplemental Table 2

A.

| STD | STD + 20 ug<br>Toci (%) | P value       | STD + 80 ug<br>Toci (%) | P value       | STD + 1.78 ug<br>IL-6 (%) | P value       | STD + 600 ug<br>Silt (%) | P value       |
|-----|-------------------------|---------------|-------------------------|---------------|---------------------------|---------------|--------------------------|---------------|
| 1   | -5                      | 0.1164        | -9                      | 0.0897        | -12                       | <b>0.0144</b> | 4                        | <b>0.0466</b> |
| 2   | -13                     | <b>0.0068</b> | -14                     | <b>0.0057</b> | -8                        | 0.0622        | 6                        | 0.0929        |
| 3   | -17                     | <b>0.0035</b> | -18                     | <b>0.0026</b> | -6                        | <b>0.0437</b> | 2                        | 0.1453        |
| 4   | -19                     | <b>0.0048</b> | -18                     | <b>0.0209</b> | -2                        | 0.1620        | 3                        | 0.0639        |
| 5   | -21                     | <b>0.0064</b> | -23                     | <b>0.0051</b> | -13                       | <b>0.0376</b> | -3                       | 0.2078        |
| 6   | -33                     | <b>0.0005</b> | -28                     | <b>0.0006</b> | -18                       | <b>0.0004</b> | -6                       | <b>0.0372</b> |
| 7   | -25                     | <b>0.0043</b> | -24                     | <b>0.0208</b> | -7                        | 0.0576        | -2                       | 0.2604        |

B.

| STD | STD + 20 ug<br>Toci (%) | P value       | STD + 80 ug<br>Toci (%) | P value       | STD + 1.78 ug<br>IL-6 (%) | P value       | STD + 600 ug<br>Silt (%) | P value       |
|-----|-------------------------|---------------|-------------------------|---------------|---------------------------|---------------|--------------------------|---------------|
| 1   | -51                     | <b>0.0098</b> | -49                     | <b>0.0104</b> | -27                       | <b>0.0331</b> | 16                       | 0.1210        |
| 2   | -61                     | <b>0.0016</b> | -56                     | <b>0.0010</b> | -34                       | <b>0.0006</b> | 13                       | <b>0.0036</b> |
| 3   | -62                     | <b>0.0193</b> | -67                     | <b>0.0165</b> | -42                       | 0.0571        | 4                        | 0.4015        |
| 4   | -63                     | <b>0.0020</b> | -59                     | <b>0.0001</b> | -39                       | <b>0.0004</b> | 3                        | 0.3112        |
| 5   | -62                     | <b>0.0002</b> | -62                     | <b>0.0006</b> | -47                       | <b>0.0007</b> | -7                       | 0.0761        |
| 6   | -59                     | <b>0.0049</b> | -63                     | <b>0.0043</b> | -40                       | <b>0.0106</b> | -9                       | 0.1756        |
| 7   | -70                     | <b>0.0122</b> | -74                     | <b>0.0106</b> | -64                       | <b>0.0163</b> | -16                      | 0.1882        |

Supplemental Table 3

|         | Patient Sex | Age at Infusion | Disease             | original IL-6 (pg/ml) | diluted IL-6 (pg/ml) | original sIL-6R (pg/ml) | diluted sIL-6R (pg/ml) | original sgp130 (pg/ml) | diluted sgp130 (pg/ml) | Siltuximab treatment | Tocilizumab treatment |
|---------|-------------|-----------------|---------------------|-----------------------|----------------------|-------------------------|------------------------|-------------------------|------------------------|----------------------|-----------------------|
| Serum 1 | Female      | 10              | ALL                 | 9899                  | 495                  | 161086                  | 8054                   | 407618                  | 20381                  | N/A                  | N/A                   |
| Serum 2 | Female      | 60              | CLL                 | 8335                  | 1250                 | N/A                     | N/A                    | N/A                     | N/A                    | no                   | no                    |
| Serum 3 | Male        | 43              | Follicular lymphoma | 224                   | 11.2                 | 125818                  | 6291                   | 130530                  | 6527                   | no                   | no                    |
| Serum 4 | Female      | 50              | ALL                 | 2975                  | 148.8                | 191953                  | 9598                   | 279759                  | 13988                  | no                   | 1 dose <sup>a</sup>   |

<sup>a</sup> - 5 days before this sample collection
